# Supplementary material for: Effect of DMSO on the catalytical production of 2,5-bis(hydoxymethyl)furan from 5-hydroxymethylfurfural over Ni/SiO2catalysts
Source: Royal Society of Chemistry journal article supplement (doi:10.1039/d1re00255d), 2021-10-13
Supplement: d1re00255d1.pdf [file d1re00255d1.pdf]

## Supplementary Information

### Effect of DMSO on the catalytical production of 2,5-bis(hydroxymethyl)furan from 5-hydroxymethylfurfural over Ni/SiO<sub>2</sub> catalysts

Houman Ojagh,<sup>a</sup> Abdenour Achour,<sup>a</sup> Hoang Phuoc Ho,<sup>a</sup> Diana Bernin,<sup>a</sup> Derek Creaser,<sup>a</sup> Oleg Pajalic,<sup>b</sup>  
Johan Holmberg<sup>b</sup> and Louise Olsson<sup>a\*</sup>

<sup>a</sup> Competence center for Catalysis, Chemical Engineering, Chalmers University of Technology, SE 412 96 Gothenburg, Sweden

<sup>b</sup> Perstorp AB, Industriparken, 284 80 Perstorp, Sweden

Email: [louise.olsson@chalmers.se](mailto:louise.olsson@chalmers.se)

#### Table of contents:

1. Equations for yield, conversion, selectivity and carbon recovery calculations.
2. **Figure 1S.** HAADF-STEM micrograph analyses of spent 15Ni/SiO<sub>2</sub> catalyst (a) and the corresponding positions of EDX spectra (b).

**1. Equations for yield, conversion, selectivity and carbon recovery calculations.**

$$\text{Product yield (mol. \%)} = \frac{(\text{product moles})}{(\text{initial moles of HMF})} \times 100$$

$$\text{Conversion ( \%)} = \left(1 - \frac{\text{moles of unreacted HMF}}{\text{initial moles of HMF}}\right) \times 100$$

$$\text{Product selectivity (mol. \%)} = \frac{(\text{yield})}{(\text{conversion})} \times 100$$

$$\text{Product carbon (mol. \%)} = \frac{(\text{product moles} \times n_p)}{(\text{initial moles of HMF} \times n_{HMF})} \times 100$$

where  $n_{HMF}$  and  $n_p$  were the numbers of carbon in the corresponding HMF and product.

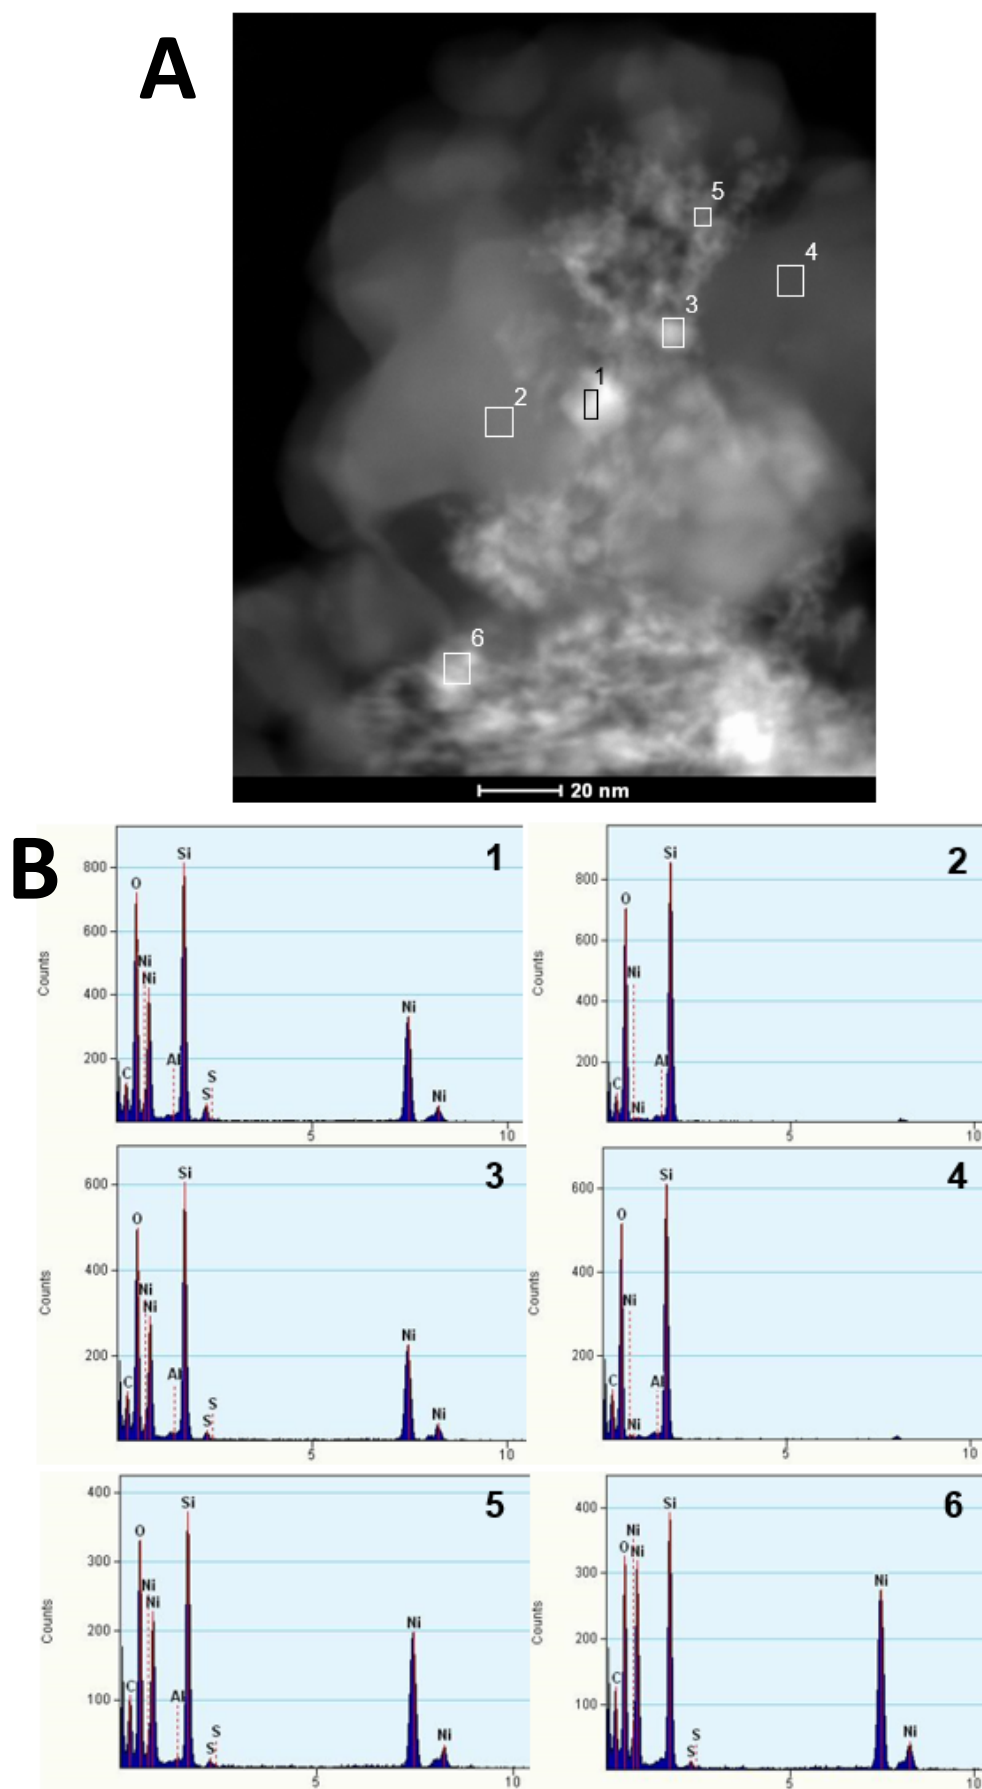

**Figure S1.** HAADF-STEM micrograph analyses of spent 15Ni/SiO<sub>2</sub> catalyst (a) and the corresponding positions of EDX spectra (b).
